# Supplementary material for: Complementary bonding analysis of the N–Si interaction in pentacoordinated silicon compounds using quantum crystallography
Source: Royal Society of Chemistry journal article supplement (doi:10.1039/c9dt02772f), 2019-01-01
Supplement: c9dt02772f1.pdf [file c9dt02772f1.pdf]

# Supplementary Information – Complementary bonding analysis of the N–Si interaction in pentacoordinated silicon compounds using quantum crystallography

Malte Fugel<sup>a</sup>, Maksym V. Ponomarenko<sup>b</sup>, Maxie F. Hesse<sup>a</sup>, Lorraine A. Malaspina<sup>a</sup>,  
Florian Kleemiss<sup>a,c</sup>, Kuniyoshi Sugimoto<sup>d,e</sup>, Alessandro Genoni<sup>f</sup>, Gerd-Volker  
Röschenthaler<sup>b</sup>, and Simon Grabowsky<sup>a,c,\*</sup>

<sup>a</sup>University of Bremen, Department 2: Biology/Chemistry, Institute of Inorganic Chemistry and Crystallography, Leobener Str. 3, 28359 Bremen, Germany.

<sup>b</sup>Jacobs University, Life Sciences & Chemistry, Campus Ring 1, 28759 Bremen, Germany.

<sup>c</sup>Current address: University of Bern, Department of Chemistry and Biochemistry, Freiestrasse 3, 3012 Bern, Switzerland. \* Corresponding author e-mail address: simon.grabowsky@dcb.unibe.ch

<sup>d</sup>JASRI / Diffraction & Scattering Division, 1-1-1 Kouto, Sayo-cho, Sayo-gun, Hyogo 679-5198, Japan.

<sup>e</sup>Institute for Integrated Cell-Material Sciences (iCeMS), Kyoto University, Yoshida-Ushinomiya-cho, Sakyo-ku, Kyoto 606-8501, Japan.

<sup>f</sup>Université de Lorraine, CNRS, Laboratoire LPCT, 1 Boulevard Arago, 57078 Metz, France.

## 1 Characterization of the compounds

### 8-(Chloro(methyl)(phenyl)silyl)-N,N-dimethylnaphthalen-1-amine, **3**

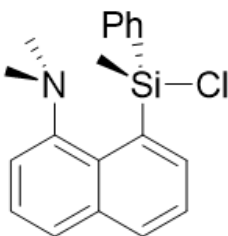

White crystals; melting point = 149 - 150°C; <sup>1</sup>H NMR (401 MHz, CDCl<sub>3</sub>) δ 8.73 (dd, J = 7.0, 1.1 Hz, 1H), 7.97 (dd, J = 8.1, 1.0 Hz, 1H), 7.76 (d, J = 8.1 Hz, 1H), 7.69 (dd, J = 8.1, 7.0 Hz, 1H), 7.46 (t, J = 7.8 Hz, 1H), 7.37 (m, 2H), 7.40-7.33 (m, 3H), 7.22 (dd, J = 7.4, 0.8 Hz, 1H), 2.57 (s, 3H, NMe<sub>2</sub>), 1.69 (s, 3H, NMe<sub>2</sub>), 1.08 (s, 3H, SiMe); <sup>13</sup>C NMR (101 MHz, CDCl<sub>3</sub>) δ 150.9, 140.1, 139.6, 134.7, 134.0, 131.3, 130.5, 129.0, 128.2, 128.0, 126.7, 126.2, 126.0, 116.5, 48.3 (NMe<sub>2</sub>), 47.9 (NMe<sub>2</sub>), 3.2 (SiMe); <sup>29</sup>Si{<sup>1</sup>H} NMR (80 MHz, CDCl<sub>3</sub>) δ -14.4; HRMS (EI) calculated for C<sub>19</sub>H<sub>20</sub>CINSi [M]<sup>+</sup>: 325.10481, found: 325.10531.

### 8-(Fluoro(methyl)(phenyl)silyl)-N,N-dimethylnaphthalen-1-amine, 1

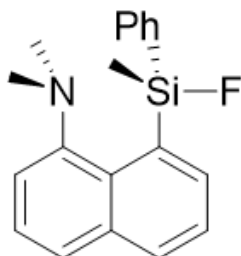

White crystals; mp = 84 - 85°C;  $^1\text{H}$  NMR (401 MHz,  $\text{CDCl}_3$ )  $\delta$  8.34 (dd,  $J = 6.8, 0.7$  Hz, 1H), 7.96 (d,  $J = 8.1$  Hz, 1H), 7.72 (d,  $J = 8.1$  Hz, 1H), 7.64 (dd,  $J = 7.7, 7.3$  Hz, 1H), 7.48-7.38 (m, 3H), 7.34-7.22 (m, 4H), 2.54 (s, 3H,  $\text{NMe}_2$ ), 1.67 (s, 3H,  $\text{NMe}_2$ ), 0.77 (d,  $3\text{J}_{\text{HF}} = 8.4$  Hz, 3H, SiMe);  $^{13}\text{C}$  NMR (101 MHz,  $\text{CDCl}_3$ )  $\delta$  151.9, 138.2 (d,  $^2\text{J}_{\text{FC}} = 23.0$  Hz), 137.3 (d,  $^3\text{J}_{\text{FC}} = 9.0$  Hz), 135.1 (d,  $\text{J}_{\text{FC}} = 2.6$  Hz), 134.3 (d,  $\text{J}_{\text{FC}} = 1.4$  Hz), 132.4 (d,  $\text{J}_{\text{FC}} = 1.0$  Hz), 130.4 (d,  $\text{J}_{\text{FC}} = 0.9$  Hz), 129.6 (d,  $^2\text{J}_{\text{FC}} = 18.3$  Hz), 129.2 (d,  $\text{J}_{\text{FC}} = 1.1$  Hz), 127.8, 126.5, 126.2, 125.9, 117.2, 48.3 ( $\text{NMe}_2$ ), 47.8 ( $\text{NMe}_2$ ), -2.1 (d,  $^2\text{J}_{\text{FC}} = 22.8$  Hz, SiMe);  $^{19}\text{F}$  NMR (377 MHz,  $\text{CDCl}_3$ )  $\delta$  -134.5 (bs);  $^{29}\text{Si}\{^1\text{H}\}$  NMR (80 MHz,  $\text{CDCl}_3$ )  $\delta$  -11.7 (d,  $^1\text{J}_{\text{SiF}} = 264.4$  Hz); HRMS (EI) calculated for  $\text{C}_{19}\text{H}_{20}\text{FNSi}$   $[\text{M}]^+$ : 309.13490, found: 309.13389.

### 1-(8-(Methoxy(methyl)(phenyl)silyl)naphthalen-1-yl)-N,N-dimethylmethanamine, 4

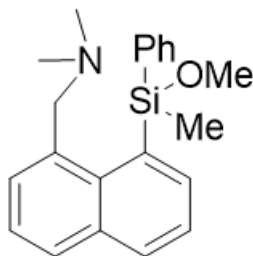

Yellow oil;  $^1\text{H}$  NMR (400 MHz,  $\text{CDCl}_3$ )  $\delta$  8.18 (dd,  $J = 6.9, 1.3$  Hz, 1H), 7.95 (dd,  $J = 8.1, 1.3$  Hz, 1H), 7.77 (dd,  $J = 10.3, 7.7$  Hz, 2H), 7.57-7.44 (m, 4H), 7.41-7.29 (m, 3H), 3.76 (d-AB,  $J = 14.0$  Hz, 1H,  $\text{CH}_2$ ), 3.72 (d-AB,  $J = 14.0$  Hz, 1H,  $\text{CH}_2$ ), 3.40 (d,  $J = 3.4$  Hz, 3H, SiOMe), 1.88 (s, 6H,  $\text{NMe}_2$ ), 0.80 (s, 3H, SiMe);  $^{29}\text{Si}\{^1\text{H}\}$  NMR (80 MHz,  $\text{CD}_2\text{Cl}_2$ )  $\delta$  -2.50.

### 1-(8-(Fluoro(methyl)(phenyl)silyl)naphthalen-1-yl)-N,N-dimethylmethanamine, 2

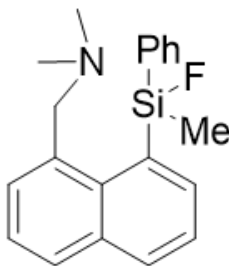

White crystals; mp = 79-80°C;  $^1\text{H}$  NMR (400 MHz,  $\text{CDCl}_3$ )  $\delta$  8.41 (d,  $J = 7.1$  Hz, 1H), 7.98 (dd,  $J = 8.1, 1.3$  Hz, 1H), 7.83 (d,  $J = 7.9$  Hz, 1H), 7.58 (dd,  $J = 7.7, 7.5$  Hz, 1H), 7.55-7.50 (m, 2H), 7.45-7.26 (m, 5H), 3.86 (d-AB,  $^2\text{J} = 14.6$  Hz, 1H,  $\text{CH}_2$ ), 3.82 (d-AB,  $^2\text{J} = 14.6$  Hz, 1H,  $\text{CH}_2$ ), 1.85 (s, 6H,  $\text{NMe}_2$ ), 0.84 (d,  $^3\text{J}_{\text{HF}} = 9.5$  Hz, 3H, SiMe);  $^{13}\text{C}$  NMR (101 MHz,  $\text{CDCl}_3$ )  $\delta$  139.0 (d,  $\text{J}_{\text{FC}} = 12.0$  Hz), 135.7, 134.4, 133.9, 132.6, 132.0, 129.7, 128.9, 127.7, 127.7, 125.2, 124.9, 64.8 ( $\text{CH}_2$ ), 45.5 ( $\text{NMe}_2$ ), -0.5 (d,  $\text{J}_{\text{FC}} = 28.3$  Hz, SiMe);  $^{19}\text{F}$  NMR (377 MHz,  $\text{CDCl}_3$ )  $\delta$  -112.5 (bs);  $^{29}\text{Si}\{^1\text{H}\}$  NMR (80 MHz,  $\text{CDCl}_3$ )  $\delta$  -26.5 (d,  $J = 262.7$  Hz); HRMS (EI) calculated for  $\text{C}_{20}\text{H}_{22}\text{FNSi}$   $[\text{M}]^+$ : 323.15001, found: 323.14977.

## 1-(8-(Fluoro(methyl)(phenyl)silyl)naphthalen-1-yl)-N,N-dimethyl ammonium tetrafluoroborate, 5

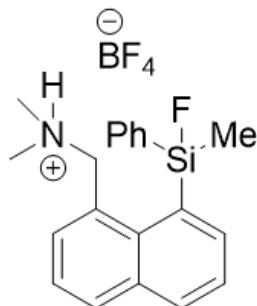

White crystals; mp = 119-120°C;  $^1\text{H}$  NMR (401 MHz,  $\text{CD}_2\text{Cl}_2$ )  $\delta$  11.23 (bs, 1H, NH), 8.16 (ddd,  $J = 9.6, 7.6, 1.4$  Hz, 2H), 8.09 (dd,  $J = 8.1, 1.4$  Hz, 1H), 7.79 (dd,  $J = 7.2, 1.4$  Hz, 1H), 7.71-7.62 (m, 2H), 7.57-7.48 (m, 3H), 7.43 (tm,  $J = 7.3$  Hz, 2H), 4.81 (dd-ABX,  $J = 13.7, 6.3$  Hz, 1H,  $\text{CH}_2$ ), 4.41 (ddd-ABX,  $J = 13.7, 6.1, 1.5$  Hz, 1H,  $\text{CH}_2$ ), 2.44 (d,  $J = 4.6$  Hz, 3H,  $\text{NMe}_2$ ), 2.43 (d,  $J = 4.7$  Hz, 3H,  $\text{NMe}_2$ ), 0.88 (d,  $^3J_{\text{HF}} = 7.9$  Hz, 3H,  $\text{SiMe}$ );  $^{13}\text{C}$  NMR (101 MHz,  $\text{CD}_2\text{Cl}_2$ )  $\delta$  140.1 (d,  $J_{\text{FC}} = 5.0$  Hz), 136.5, 135.6, 135.4 (d,  $J_{\text{FC}} = 16.2$  Hz), 134.5, 134.0 (d,  $J_{\text{FC}} = 1.7$  Hz), 133.7, 132.3, 132.0, 129.4, 128.3 (d,  $J_{\text{FC}} = 15.4$  Hz), 126.9, 126.9, 125.8, 60.9 (d,  $J_{\text{FC}} = 8.6$  Hz,  $\text{CH}_2$ ), 43.6 ( $\text{NMe}_2$ ), 43.1 (d,  $J_{\text{FC}} = 2.5$  Hz,  $\text{NMe}_2$ ), 0.7 (d,  $J_{\text{FC}} = 17.7$  Hz,  $\text{SiMe}$ );  $^{19}\text{F}$  NMR (377 MHz,  $\text{CD}_2\text{Cl}_2$ )  $\delta$  -151.63 (4F,  $\text{BF}_4$ ), -153.15 (q,  $^3J_{\text{FH}} = 7.8$  Hz, 1F,  $\text{SiF}$ );  $^{29}\text{Si}\{^1\text{H}\}$  NMR (80 MHz,  $\text{CD}_2\text{Cl}_2$ )  $\delta$  12.1 (d,  $J_{\text{SiF}} = 282.5$  Hz); HR ESI-TOF MS (Positive mode) calculated for  $\text{C}_{20}\text{H}_{23}\text{FNSi}$ : 324.1584, found: 324.1581.

## 2 Crystallographic details

### 2.1 Fractal dimension plots

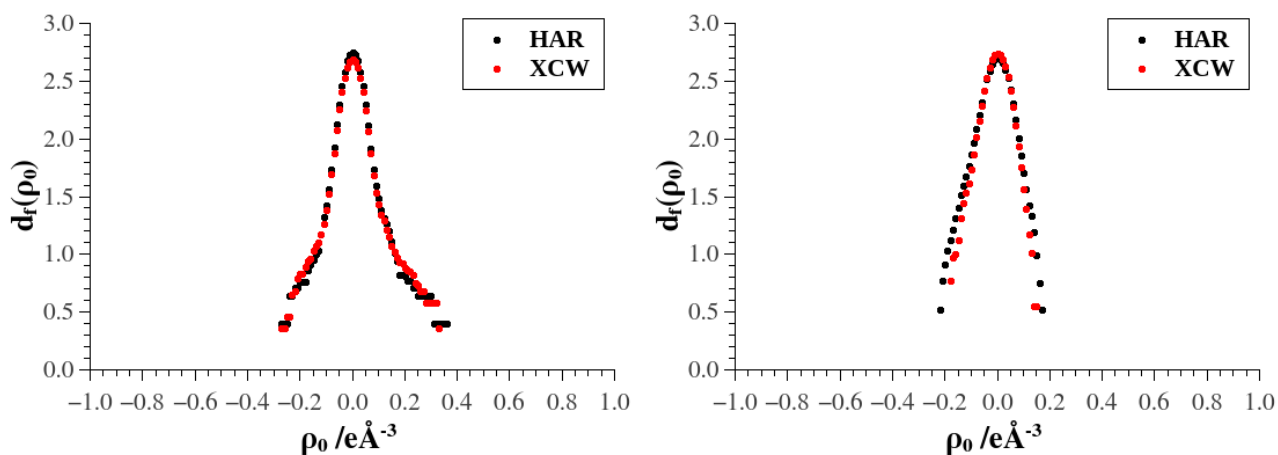

**Figure S1.** Fractal dimension plot of the HAR and XCW of the  $\text{Me}_2\text{N}$  substituted compound **1** from the synchrotron measurement (left) and of the  $\text{Me}_2\text{NCH}_2$  substituted compound **2** from the home measurement (right).

## 2.2 Residual and deformation density plots

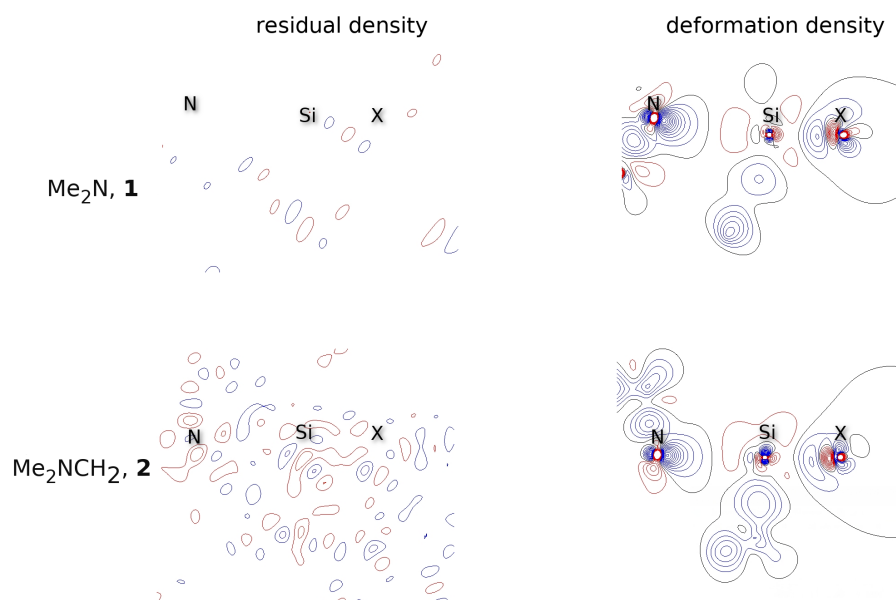

**Figure S2.** Residual and deformation density contour plots of the N–Si–X plane of both compounds after XWR. Blue and red lines refer to positive and negative contour lines, respectively. The line separation is  $0.05 \text{ e} \cdot \text{\AA}^{-3}$  in the residual density maps and  $0.1 \text{ e} \cdot \text{\AA}^{-3}$  for the deformation density maps.

### 3 Coordinates of the optimized structures

**Table S1.** Coordinates of the isolated molecule optimization of compound **1**.

|    |    | x /Å      | y /Å      | z /Å      |
|----|----|-----------|-----------|-----------|
| 1  | Si | 10.098775 | 3.595633  | 2.791147  |
| 2  | F  | 10.382040 | 3.108906  | 4.329202  |
| 3  | N  | 9.843913  | 4.672309  | 0.269702  |
| 4  | C  | 13.322215 | 6.031645  | 3.664503  |
| 5  | C  | 9.468911  | 1.146900  | 1.478516  |
| 6  | C  | 11.764999 | 5.410620  | -1.083508 |
| 7  | C  | 11.430271 | 4.911171  | 2.603378  |
| 8  | C  | 11.739902 | 1.864554  | 1.216049  |
| 9  | C  | 12.001469 | 0.754852  | 0.421709  |
| 10 | C  | 11.194904 | 5.128783  | 0.134470  |
| 11 | C  | 11.910231 | 5.369093  | 1.339748  |
| 12 | C  | 10.991728 | -0.162008 | 0.151714  |
| 13 | C  | 13.040285 | 6.003840  | -1.159896 |
| 14 | C  | 13.837777 | 6.389592  | 2.448968  |
| 15 | C  | 12.144927 | 5.260049  | 3.733571  |
| 16 | C  | 9.723840  | 0.033597  | 0.686797  |
| 17 | C  | 10.467405 | 2.086851  | 1.752638  |
| 18 | C  | 13.707850 | 6.350435  | -0.016584 |
| 19 | C  | 13.161886 | 6.049986  | 1.253802  |
| 20 | C  | 8.939270  | 5.824334  | 0.382049  |
| 21 | C  | 9.387928  | 3.752732  | -0.767525 |
| 22 | C  | 8.276695  | 4.006657  | 2.898081  |
| 23 | H  | 7.736076  | 3.810486  | 1.974439  |
| 24 | H  | 8.438927  | 3.316034  | -0.455730 |
| 25 | H  | 12.535724 | 2.572614  | 1.409513  |
| 26 | H  | 9.230652  | 4.248504  | -1.734586 |
| 27 | H  | 8.934569  | -0.680163 | 0.486041  |
| 28 | H  | 14.774804 | 6.929157  | 2.382111  |
| 29 | H  | 8.472422  | 1.285064  | 1.881522  |
| 30 | H  | 14.668180 | 6.848513  | -0.066889 |
| 31 | H  | 11.221150 | 5.209166  | -1.996001 |
| 32 | H  | 11.821529 | 4.894700  | 4.698564  |
| 33 | H  | 9.244142  | 6.452804  | 1.216601  |
| 34 | H  | 7.923248  | 5.476355  | 0.557788  |
| 35 | H  | 8.120134  | 5.051435  | 3.169467  |
| 36 | H  | 13.840940 | 6.295996  | 4.577194  |
| 37 | H  | 13.470046 | 6.216655  | -2.130160 |
| 38 | H  | 11.192705 | -1.025802 | -0.469269 |
| 39 | H  | 12.992679 | 0.606131  | 0.011952  |
| 40 | H  | 10.109292 | 2.949206  | -0.889333 |
| 41 | H  | 8.950695  | 6.429367  | -0.534028 |
| 42 | H  | 7.838583  | 3.393660  | 3.687947  |

**Table S2.** Coordinates of the isolated molecule optimization of compound **2**.

|    |    | x /Å     | y /Å      | z /Å     |
|----|----|----------|-----------|----------|
| 1  | Si | 4.967131 | 7.457496  | 2.479674 |
| 2  | F  | 6.272435 | 6.725492  | 1.782263 |
| 3  | N  | 2.864939 | 8.652628  | 3.558314 |
| 4  | C  | 5.405173 | 10.347988 | 3.347530 |
| 5  | C  | 6.443882 | 9.435931  | 1.359713 |
| 6  | C  | 5.590902 | 9.248023  | 2.435851 |
| 7  | C  | 4.462311 | 10.385792 | 4.424787 |
| 8  | C  | 5.014795 | 6.580475  | 4.130734 |
| 9  | C  | 6.204155 | 11.530096 | 3.155440 |
| 10 | C  | 4.389564 | 4.711718  | 5.552013 |
| 11 | C  | 4.281624 | 5.412014  | 4.355890 |
| 12 | C  | 5.885080 | 7.010134  | 5.138367 |
| 13 | C  | 5.996628 | 6.317093  | 6.337345 |
| 14 | C  | 7.161800 | 10.622439 | 1.137053 |
| 15 | C  | 3.456614 | 9.305473  | 4.725057 |
| 16 | C  | 5.244030 | 5.167342  | 6.548850 |
| 17 | C  | 7.067208 | 11.637852 | 2.041714 |
| 18 | C  | 4.416979 | 11.477916 | 5.264135 |
| 19 | C  | 6.131715 | 12.613104 | 4.061131 |
| 20 | C  | 5.265473 | 12.584397 | 5.115258 |
| 21 | C  | 2.261905 | 9.614964  | 2.636277 |
| 22 | C  | 1.848481 | 7.711681  | 4.021418 |
| 23 | C  | 3.693275 | 6.907843  | 1.220158 |
| 24 | H  | 6.605536 | 8.619707  | 0.669895 |
| 25 | H  | 3.810270 | 3.809628  | 5.704627 |
| 26 | H  | 2.661129 | 9.756551  | 5.336552 |
| 27 | H  | 3.017137 | 10.290019 | 2.243507 |
| 28 | H  | 6.480752 | 7.902813  | 4.987936 |
| 29 | H  | 3.613049 | 5.039040  | 3.588919 |
| 30 | H  | 5.329445 | 4.625022  | 7.481883 |
| 31 | H  | 7.642497 | 12.547876 | 1.922053 |
| 32 | H  | 1.481157 | 10.211326 | 3.130225 |
| 33 | H  | 3.683738 | 11.486564 | 6.061438 |
| 34 | H  | 2.289885 | 7.005005  | 4.719821 |
| 35 | H  | 3.910632 | 8.523351  | 5.333515 |
| 36 | H  | 6.672433 | 6.671929  | 7.105339 |
| 37 | H  | 3.927646 | 5.883106  | 0.925752 |
| 38 | H  | 6.769569 | 13.471218 | 3.888675 |
| 39 | H  | 1.809266 | 9.080067  | 1.802764 |
| 40 | H  | 7.808066 | 10.705738 | 0.272831 |
| 41 | H  | 1.434559 | 7.158045  | 3.180009 |
| 42 | H  | 1.023417 | 8.235008  | 4.526577 |
| 43 | H  | 5.202943 | 13.412753 | 5.808599 |
| 44 | H  | 2.656106 | 6.948561  | 1.534875 |
| 45 | H  | 3.798619 | 7.527182  | 0.326163 |

**Table S3.** Coordinates of compound **1** with an implicit water solvation.

|    |    | x /Å     | y /Å      | z /Å     |
|----|----|----------|-----------|----------|
| 1  | F  | 5.529848 | 9.535195  | 1.294919 |
| 2  | Si | 4.388115 | 8.905336  | 2.318801 |
| 3  | N  | 2.681655 | 7.598786  | 3.914336 |
| 4  | C  | 4.330569 | 11.733271 | 5.362906 |
| 5  | C  | 6.40902  | 4.705543  | 2.767303 |
| 6  | C  | 5.140816 | 4.292448  | 4.850786 |
| 7  | C  | 6.677606 | 5.504613  | 1.687979 |
| 8  | C  | 3.560752 | 6.545539  | 4.329395 |
| 9  | C  | 2.099277 | 8.384354  | 5.002227 |
| 10 | C  | 5.203114 | 11.20916  | 6.31079  |
| 11 | C  | 4.640222 | 6.248102  | 3.454455 |
| 12 | C  | 4.728646 | 9.825265  | 3.910181 |
| 13 | C  | 4.098793 | 11.046015 | 4.176517 |
| 14 | C  | 3.350356 | 5.790811  | 5.458036 |
| 15 | C  | 5.84638  | 10.001145 | 6.061053 |
| 16 | C  | 5.400108 | 5.064354  | 3.692527 |
| 17 | C  | 4.161713 | 4.670298  | 5.73107  |
| 18 | C  | 5.996708 | 6.729049  | 1.525916 |
| 19 | C  | 5.6114   | 9.320493  | 4.871678 |
| 20 | C  | 1.620798 | 7.041937  | 3.055629 |
| 21 | C  | 4.992225 | 7.126282  | 2.387817 |
| 22 | C  | 2.840235 | 9.451992  | 1.426844 |
| 23 | H  | 7.446496 | 5.223976  | 0.979524 |
| 24 | H  | 5.73613  | 3.406394  | 5.032616 |
| 25 | H  | 5.380714 | 11.738574 | 7.238233 |
| 26 | H  | 3.977919 | 4.089627  | 6.625646 |
| 27 | H  | 2.537166 | 6.028707  | 6.129268 |
| 28 | H  | 6.303996 | 7.38752   | 0.725025 |
| 29 | H  | 2.88483  | 8.716492  | 5.675603 |
| 30 | H  | 1.349502 | 7.822296  | 5.570767 |
| 31 | H  | 3.827555 | 12.673673 | 5.55027  |
| 32 | H  | 1.613132 | 9.261945  | 4.577332 |
| 33 | H  | 6.969166 | 3.793457  | 2.933442 |
| 34 | H  | 6.527724 | 9.588198  | 6.794367 |
| 35 | H  | 0.979066 | 7.845236  | 2.701697 |
| 36 | H  | 1.008231 | 6.319797  | 3.607943 |
| 37 | H  | 3.405909 | 11.465227 | 3.456617 |
| 38 | H  | 2.013613 | 9.671323  | 2.098911 |
| 39 | H  | 2.064901 | 6.541093  | 2.197757 |
| 40 | H  | 6.113074 | 8.376543  | 4.698705 |
| 41 | H  | 3.072677 | 10.35974  | 0.866791 |
| 42 | H  | 2.508064 | 8.697552  | 0.712649 |

**Table S4.** Coordinates of compound **2** with implicit water solvation.

|    |    | x /Å     | y /Å      | z /Å     |
|----|----|----------|-----------|----------|
| 1  | Si | 4.811973 | 7.522685  | 2.536691 |
| 2  | F  | 6.140688 | 6.737808  | 1.845386 |
| 3  | N  | 2.91668  | 8.644157  | 3.527252 |
| 4  | C  | 5.392283 | 10.372182 | 3.362829 |
| 5  | C  | 6.406056 | 9.435932  | 1.377415 |
| 6  | C  | 5.548157 | 9.269856  | 2.451994 |
| 7  | C  | 4.450379 | 10.412839 | 4.437131 |
| 8  | C  | 4.949989 | 6.600658  | 4.168105 |
| 9  | C  | 6.210384 | 11.539979 | 3.174816 |
| 10 | C  | 4.457743 | 4.666853  | 5.557779 |
| 11 | C  | 4.271222 | 5.397936  | 4.388941 |
| 12 | C  | 5.844451 | 7.034114  | 5.153745 |
| 13 | C  | 6.035203 | 6.31037   | 6.325457 |
| 14 | C  | 7.153395 | 10.607041 | 1.159586 |
| 15 | C  | 3.444979 | 9.328911  | 4.716408 |
| 16 | C  | 5.338044 | 5.124468  | 6.532172 |
| 17 | C  | 7.078875 | 11.62818  | 2.062578 |
| 18 | C  | 4.410936 | 11.500413 | 5.281924 |
| 19 | C  | 6.146632 | 12.621845 | 4.083874 |
| 20 | C  | 5.273418 | 12.598499 | 5.134724 |
| 21 | C  | 2.308714 | 9.608524  | 2.595902 |
| 22 | C  | 1.881207 | 7.70058   | 3.97354  |
| 23 | C  | 3.626081 | 6.92024   | 1.213004 |
| 24 | H  | 6.539844 | 8.621134  | 0.680224 |
| 25 | H  | 3.916299 | 3.741112  | 5.707375 |
| 26 | H  | 2.612494 | 9.774686  | 5.273944 |
| 27 | H  | 3.065176 | 10.272462 | 2.188942 |
| 28 | H  | 6.397216 | 7.955295  | 5.009919 |
| 29 | H  | 3.580938 | 5.021272  | 3.643586 |
| 30 | H  | 5.483056 | 4.559256  | 7.443973 |
| 31 | H  | 7.673084 | 12.525494 | 1.940239 |
| 32 | H  | 1.544934 | 10.207614 | 3.104205 |
| 33 | H  | 3.676472 | 11.513983 | 6.077892 |
| 34 | H  | 2.295065 | 7.024415  | 4.715829 |
| 35 | H  | 3.878849 | 8.564864  | 5.36056  |
| 36 | H  | 6.727566 | 6.67054   | 7.076108 |
| 37 | H  | 3.70451  | 5.832219  | 1.156478 |
| 38 | H  | 6.7943   | 13.473848 | 3.91839  |
| 39 | H  | 1.837688 | 9.073085  | 1.775826 |
| 40 | H  | 7.801662 | 10.677891 | 0.295623 |
| 41 | H  | 1.516382 | 7.118135  | 3.130758 |
| 42 | H  | 1.036443 | 8.239108  | 4.418181 |
| 43 | H  | 5.21733  | 13.426278 | 5.829264 |
| 44 | H  | 2.578769 | 7.180132  | 1.317002 |
| 45 | H  | 3.978381 | 7.311504  | 0.255356 |
